# Supplementary material for: Time from diagnosis to treatment has no impact on survival in newly diagnosed acute myeloid leukemia treated with venetoclax-based regimens
Source: PubMed Central journal article supplement — Haematologica. 2024 Apr 24;109(8):2469–77. doi: 10.3324/haematol.2024.285225 (PMC11290507; doi:10.3324/haematol.2024.285225), 2024-04-24
Supplement: 2024_285225_BADEN_SUPPL.pdf [file 2024_285225_BADEN_SUPPL.pdf]

# Time from diagnosis to treatment has no impact on survival in newly diagnosed acute myeloid leukemia treated with venetoclax-based regimens

David Baden,<sup>1,2</sup> Sven Zukunft,<sup>3</sup> Gema Hernandez,<sup>4</sup> Nadine Wolgast,<sup>1,2</sup> Sophie Steinhäuser,<sup>1,2</sup> Alexander Pohlmann,<sup>5</sup> Christoph Schliemann,<sup>5</sup> Jan-Henrik Mikesch,<sup>5</sup> Björn Steffen,<sup>6</sup> Tim Sauer,<sup>7</sup> Maher Hanoun,<sup>8</sup> Kerstin Schäfer-Eckart,<sup>9</sup> Stefan W. Krause,<sup>10</sup> Mathias Hänel,<sup>11</sup> Hermann Einsele,<sup>12</sup> Edgar Jost,<sup>13</sup> Tim H. Brümmendorf,<sup>13</sup> Sebastian Scholl,<sup>14</sup> Andreas Hochhaus,<sup>14</sup> Andreas Neubauer,<sup>15</sup> Andreas Burchert,<sup>15</sup> Martin Kaufmann,<sup>16</sup> Dirk Niemann,<sup>17</sup> Markus Schaich,<sup>18</sup> Wolfgang Blau,<sup>19</sup> Alexander Kiani,<sup>20</sup> Martin Görner,<sup>21</sup> Ulrich Kaiser,<sup>22</sup> Johannes Kullmer,<sup>23</sup> Thomas Weber,<sup>24</sup> Wolfgang E. Berdel,<sup>5</sup> Gerhard Ehninger,<sup>3</sup> Carsten Müller-Tidow,<sup>7</sup> Uwe Platzbecker,<sup>25</sup> Hubert Serve,<sup>6</sup> Martin Bornhäuser,<sup>3</sup> Christoph Röllig,<sup>3</sup> Claudia D. Baldus<sup>1,2</sup> and Lars Fransecky<sup>1,2</sup>

<sup>1</sup>Department of Internal Medicine II, University Hospital Schleswig-Holstein, Kiel, Germany; <sup>2</sup>University Cancer Center Schleswig-Holstein, University Hospital Schleswig-Holstein, Kiel, Germany; <sup>3</sup>Medical Department I, University Hospital of TU Dresden, Dresden, Germany; <sup>4</sup>TriNetX, TriNetX Europe NV, Sint-Martens-Latem, Belgium; <sup>5</sup>Department of Medicine A, University Hospital Münster, Münster, Germany; <sup>6</sup>Medical Department II, J.-W.-Goethe University Hospital Frankfurt, Frankfurt, Germany; <sup>7</sup>Medical Department V, Heidelberg University Hospital, Heidelberg, Germany; <sup>8</sup>Department of Hematology, Essen University Hospital, Essen, Germany; <sup>9</sup>Medical Department 5, University Hospital of Paracelsus Medical University Nuremberg, Nuremberg, Germany; <sup>10</sup>Department of Medicine 5, Uniklinikum Erlangen, Erlangen, Germany; <sup>11</sup>Department for Internal Medicine III, Klinikum Chemnitz, Chemnitz, Germany; <sup>12</sup>Medical Department II, University Hospital Würzburg, Würzburg, Germany; <sup>13</sup>Department of Oncology, Hematology, Hemostaseology and Stem Cell Transplantation, University Hospital RWTH Aachen, and Center for Integrated Oncology (CIO), Aachen, Bonn, Cologne, Düsseldorf (ABCD), Aachen, Germany; <sup>14</sup>Klinik für Innere Medizin II, Jena University Hospital, Jena, Germany; <sup>15</sup>Department of Internal Medicine, Hematology, Oncology and Immunology, University Hospital Marburg, Marburg, Germany; <sup>16</sup>Department of Hematology, Oncology and Palliative Medicine, Robert-Bosch-Hospital Stuttgart, Stuttgart, Germany; <sup>17</sup>Internal Medicine, Hematology/Oncology, Palliative Medicine, Gemeinschaftsklinikum Mittelrhein, Koblenz, Germany; <sup>18</sup>Department for Hematology, Oncology and Palliative Medicine, Rems-Murr-Klinikum, Winnenden, Germany; <sup>19</sup>Department for Internal Medicine III, Helios Dr Schmidt Hospital Wiesbaden, Wiesbaden Germany; <sup>20</sup>Department for Oncology and Hematology, Klinikum Bayreuth, and Comprehensive Cancer Center Erlangen-EMN, Erlangen, Germany; <sup>21</sup>Department for Hematology, Oncology and Palliative Medicine, Klinikum Bielefeld, Bielefeld, Germany; <sup>22</sup>Medical Department II, St. Bernward Hospital, Hildesheim, Germany; <sup>23</sup>Medical Department II, Hematology and Oncology, DIAKO Bremen, Bremen, Germany; <sup>24</sup>Department for Internal Medicine IV, University Hospital Halle (Saale), Halle, Germany and <sup>25</sup>Medical Department I, Hematology and Cell Therapy, University Hospital Leipzig, Leipzig, Germany

**Correspondence:** D. Baden  
[david.baden@uksh.de](mailto:david.baden@uksh.de)

**Received:** February 6, 2024.

**Accepted:** April 17, 2024.

**Early view:** April 24, 2024.

<https://doi.org/10.3324/haematol.2024.285225>

©2024 Ferrata Storti Foundation

Published under a CC BY-NC license

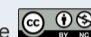

## Time from diagnosis to treatment has no impact on survival in newly diagnosed acute myeloid leukemia treated with venetoclax-based regimens - Supplement

### Table of content

| page | content                                                                                                          |
|------|------------------------------------------------------------------------------------------------------------------|
| 2    | Supplementary information on ethics and study design                                                             |
| 3    | Supplement Figure 1a: Patient selection SAL                                                                      |
| 3    | Supplement Figure 1b: Patient selection TriNetX                                                                  |
| 4    | Supplement Table 1: List of ICD-10-CM and procedural codes used for TriNetX and SAL                              |
| 6    | Supplement Figure 2: Histogram start of treatment per day per group and cohort                                   |
| 7    | Supplement Figure 3: EFS and RFS in SAL cohort                                                                   |
| 8    | Supplement Figure 4: OS of patients a) age $\geq 75$ years and with b) $WBC \geq 20 \times 10^9/L$ in SAL cohort |
| 9    | Supplement Table 2a: Patient characteristics subgroup age $\geq 75$ years TriNetX                                |
| 10   | Supplement Table 2b: Clinical subgroup age $\geq 75$ years TriNetX                                               |
| 10   | Supplement Figure 5: Overall survival of patients age $\geq 75$ years in the TriNetX-cohort                      |
| 11   | Supplement Table 3a: Patient characteristics subgroup $WBC \geq 20 \times 10^9/L$ TriNetX                        |
| 12   | Supplement Table 3b: Clinical outcomes subgroup $WBC \geq 20 \times 10^9/L$ TriNetX                              |
| 12   | Supplement Figure 6: Overall survival of patients with $WBC \geq 20 \times 10^9/L$ in the TriNetX-cohort         |
| 13   | Supplement Table 4a: Patient characteristics subgroup comorbidities TriNetX                                      |
| 14   | Supplement Table 4b: Clinical outcomes subgroup comorbidities TriNetX                                            |
| 14   | Supplement Figure 7: Overall survival of patients with comorbidities in the TriNetX-cohort                       |

## **Supplementary information on ethics and study design**

Regarding the TriNetX network, all data collection, processing, and transfers were conducted in compliance with data privacy laws applicable to the participating healthcare organizations, including EU Data Protection Regulation 2016/679, the General Data Protection Regulation on the protection of individuals regarding the processing of personal data, and the Health Insurance Portability and Accountability Act ("HIPAA"), the U.S. federal health information privacy and security law. Analyses are performed on anonymised or pseudonymised/de-identified (in accordance with HIPAA) data housed at the healthcare organisations, with only aggregated results returned to the TriNetX platform and users. Because this study used only de-identified patient records and did not involve the collection, use, or transmittal of individually identifiable data, this study was exempted from Institutional Review Board approval. Patients from both cohorts were stratified into two treatment groups: those treated within the first 9 days (TDT 0-9) and those treated from day 10 onwards (TDT  $\geq 10$ ). The cut-off was chosen based on the anticipated global accessibility of molecular test results. After 10 days, these results are expected to be readily available in the majority of cases, extending beyond academic research centres in Europe and North America <sup>1</sup>.

The term mortality when used with a percentage means death rate per patient sample.

### **Statistical analysis TriNetX-cohort**

The ICD and procedure codes used for analyses are listed in the Supplement Table 1. To improve the validity of data and account for potential documentation errors, we excluded patients from analysis who received treatment >50 days after diagnosis. Patients were assigned to the respective clinical characteristics (e.g., comorbidities) or outcomes if one or more of the listed ICD or procedure codes were listed in the EHR before the initial diagnosis or after the initial diagnosis of AML, whichever was applicable. As no statistical analyses for aggregated data other than the student's t-test are available on the platform, no comparison could be made for median and IQR. Since white blood cell counts (WBC) have a known impact on prognosis, we divided the patients into groups with high versus low leukocyte counts using a cut-off of  $20 \times 10^9/L$  and compared these as a categorical variable <sup>2</sup>. The threshold value of  $20 \times 10^9/L$  was chosen to differentiate patients in whom cytoreductive therapy, for example with hydroxyurea, was likely before starting venetoclax-based therapy. Survival calculated according to the Kaplan-Meier method was measured either from the time of diagnosis or, in the case of the analysis of early deaths, from the start of treatment. We applied Propensity Score Matching (PSM) to match patients for age and WBC and create comparable cohorts. The median follow-up time was calculated as the time from diagnosis to the last documented visit or death, whichever occurred first. For analysis of clinical outcomes and complications, patients with events prior to the first diagnosis of AML were excluded. To account for multiple testing, we applied the Bonferroni correction. The respective p-values are given.

### **References:**

1. Voso MT, Ferrara F, Galimberti S, Rambaldi A, Venditti A. Diagnostic Workup of Acute Myeloid Leukemia: What Is Really Necessary? An Italian Survey. *Front Oncol*;12.
2. Dutcher JP, Schiffer CA, Wiernik PH. Hyperleukocytosis in adult acute nonlymphocytic leukemia: impact on remission rate and duration, and survival. *J Clin Oncol Off J Am Soc Clin Oncol* 1987;5(9):1364–1372.

**Supplement Figure 1a:** Patient selection SAL

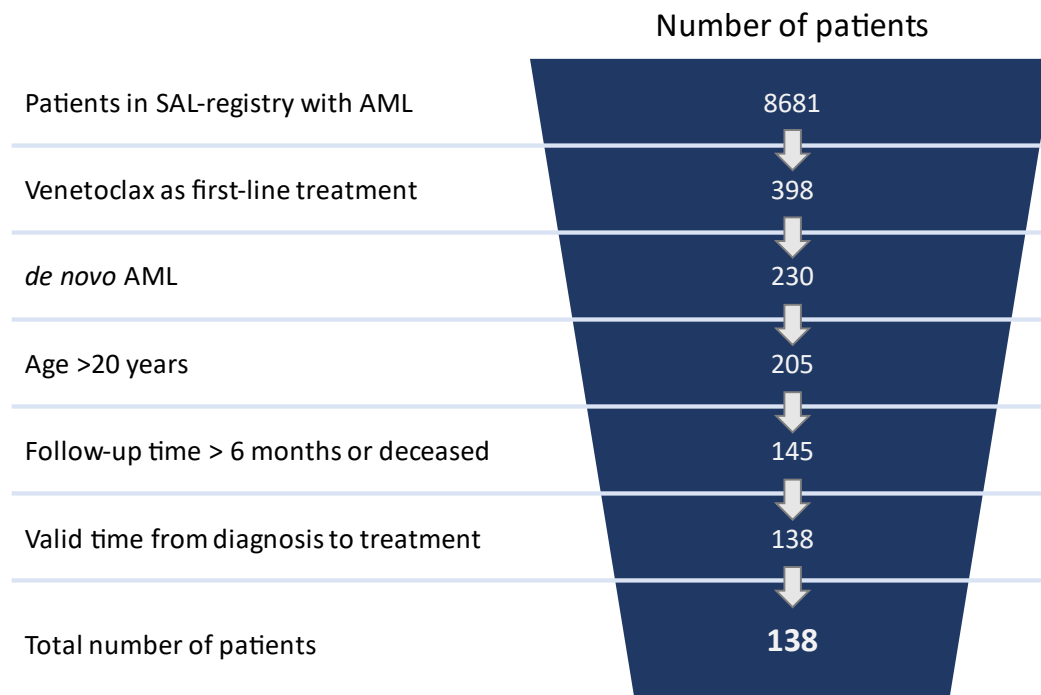

**Supplement Figure 1b:** Patient selection TriNetX

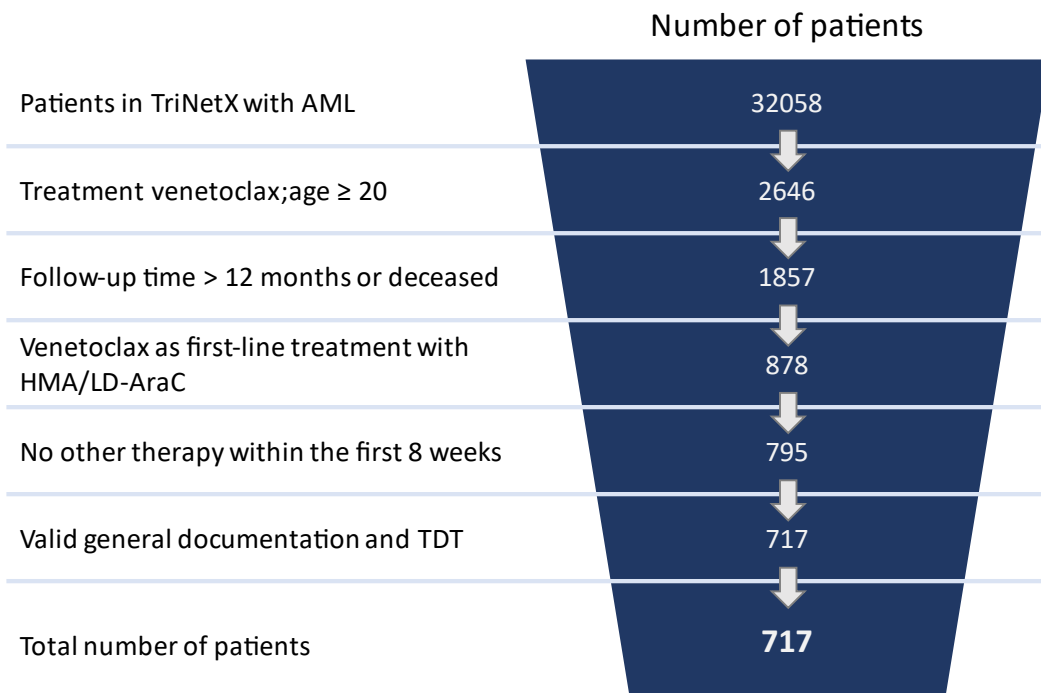

**Supplement Table 1:** List of ICD-10-CM and procedural codes used for TriNetX and SAL

| Group            | ICD-10-CM / procedure | Disease                                                                                  |
|------------------|-----------------------|------------------------------------------------------------------------------------------|
| AML              | C92.0                 | Acute myeloblastic leukemia                                                              |
| AML              | C92.5                 | Acute myelomonocytic leukemia                                                            |
| AML              | C92.6                 | Acute myeloid leukemia with 11q23-abnormality                                            |
| AML              | C92.A                 | Acute myeloid leukemia with multilineage dysplasia                                       |
| AML              | C92.9                 | Myeloid leukemia, unspecified                                                            |
| AML              | C93.0                 | Acute monoblastic/monocytic leukemia                                                     |
| AML              | C93.9                 | Monocytic leukemia, unspecified                                                          |
| AML              | C94.0                 | Acute erythroid leukemia                                                                 |
| AML              | C94.2                 | Acute megakaryoblastic leukemia                                                          |
|                  |                       |                                                                                          |
| Severe Infection | A40                   | Streptococcal sepsis                                                                     |
| Severe Infection | A41                   | Other sepsis                                                                             |
| Severe Infection | A49                   | Bacterial infection of unspecified site                                                  |
| Severe Infection | R65                   | Symptoms and signs specifically associated with systemic inflammation and infection      |
|                  |                       |                                                                                          |
| Dialysis         | CPT 1012752           | Hemodialysis Procedures                                                                  |
| Dialysis         | CPT 90935             | Hemodialysis procedure with single evaluation                                            |
| Dialysis         | CPT 90937             | Hemodialysis procedure with repeated evaluation                                          |
| Dialysis         | SNOMED 302497006      | Hemodialysis                                                                             |
| Dialysis         | SNOMED 233586004      | Hemodiafiltration                                                                        |
| Dialysis         | SNOMED 233583007      | Continuous hemofiltration                                                                |
| Dialysis         | SNOMED 233585000      | Continuous venovenous hemofiltration                                                     |
| Dialysis         | SNOMED 233582002      | Intermittend hemofiltration                                                              |
| Dialysis         | ICD9 39.95            | Hemodialysis                                                                             |
|                  |                       |                                                                                          |
| Heart failure    | I50.21                | Acute systolic (congestive) heart failure                                                |
| Heart failure    | I50.23                | Acute on chronic systolic (congestive) heart failure                                     |
| Heart failure    | I50.31                | Acute diastolic (congestive) heart failure                                               |
| Heart failure    | I50.33                | Acute on chronic diastolic (congestive) heart failure                                    |
| Heart failure    | I50.41                | Acute combined systolic (congestive) and diastolic (congestive) heart failure            |
| Heart failure    | I50.43                | Acute on chronic combined systolic (congestive) and diastolic (congestive) heart failure |
| Heart failure    | I50.811               | Acute right heart failure                                                                |
|                  |                       |                                                                                          |
| Liver failure    | K72.0                 | Acute and subacute hepatic failure without coma                                          |
| Liver failure    | K72                   | Hepatic failure, not elsewhere classified                                                |
| Liver failure    | K91.82                | Acute and subacute hepatic failure with coma                                             |
|                  |                       |                                                                                          |
| Renal failure    | N17                   | Acute kidney failure                                                                     |
| Renal failure    | N19                   | Unspecified kidney failure                                                               |
|                  |                       |                                                                                          |
| Bleeding         | R58                   | Hemorrhage, not elsewhere classified                                                     |
| Bleeding         | K92.2                 | Gastrointestinal hemorrhage, unspecified                                                 |
| Bleeding         | K13.7                 | Other and unspecified lesions of oral mucosa                                             |
| Bleeding         | J39.2                 | Other diseases of pharynx                                                                |
| Bleeding         | K22.11                | Ulcer of esophagus with bleeding                                                         |

|                   |               |                                                                                      |
|-------------------|---------------|--------------------------------------------------------------------------------------|
| Bleeding          | K29.61        | Other gastritis with bleeding                                                        |
| Bleeding          | R31           | Hematuria                                                                            |
| Bleeding          | R04.0         | Epistaxis                                                                            |
| Bleeding          | I61           | Nontraumatic intracerebral hemorrhage                                                |
| Bleeding          | I60           | Nontraumatic subarachnoid hemorrhage                                                 |
| Bleeding          | K25.0         | Acute gastric ulcer with hemorrhage                                                  |
| Bleeding          | K25.2         | Acute gastric ulcer with both hemorrhage and perforation                             |
| Bleeding          | I62           | Other and unspecified nontraumatic intracranial hemorrhage                           |
| Bleeding          | K27.0         | Acute peptic ulcer, site unspecific, with hemorrhage                                 |
| Bleeding          | K27.2         | Acute peptic ulcer, site unspecific with both hemorrhage and perforation             |
| Bleeding          | K28.0         | Acute gastrojejunal ulcer with hemorrhage                                            |
| Bleeding          | K28.2         | Acute gastrojejunal ulcer with both hemorrhage and perforation                       |
| Bleeding          | R04           | Hemorrhage from respiratory passages                                                 |
| Bleeding          | K62.5         | Hemorrhage of anus and rectum                                                        |
| Bleeding          | K92.2         | Gastrointestinal hemorrhage, unspecified                                             |
| Bleeding          | H05.23        | Hemorrhage of orbit                                                                  |
|                   |               |                                                                                      |
| Thrombosis        | I74           | Arterial embolism and thrombosis                                                     |
| Thrombosis        | I82           | Other venous embolism and thrombosis                                                 |
| Thrombosis        | I65           | Occlusion and stenosis of precerebral arteries, not resulting in cerebral infarction |
| Thrombosis        | K55.0         | Acute vascular disorders of intestine                                                |
| Thrombosis        | I26           | Pulmonary embolism                                                                   |
|                   |               |                                                                                      |
| Comorbidities     | E10, E11, E13 | Type 1 / Type 2/ Other diabetes mellitus                                             |
| Comorbidities     | I50           | Heart failure                                                                        |
| Comorbidities     | J44           | Other chronic obstructive pulmonary disease                                          |
| Comorbidities     | J84           | Other intestinal pulmonary disease                                                   |
| Comorbidities     | K70           | Alcoholic liver disease                                                              |
| Comorbidities     | K71           | Toxic liver disease                                                                  |
| Comorbidities     | K73           | Chronic hepatitis, not elsewhere classified                                          |
| Comorbidities     | K74           | Fibrosis and cirrhosis of liver                                                      |
| Comorbidities     | K76.0         | Fatty liver, not elsewhere classified                                                |
| Comorbidities     | K76.1         | Chronic passive congestion of liver                                                  |
| Comorbidities     | N18           | Chronic kidney disease (CKD)                                                         |
|                   |               |                                                                                      |
| SAL Comorbidities | N18, N19      | Renal Impairment                                                                     |
| SAL Comorbidities | E08, E13      | Diabetes Mellitus                                                                    |
| SAL Comorbidities | I48, I50      | Cardiac Comorbidities                                                                |
| SAL Comorbidities | E66           | Obesity                                                                              |

**Supplement Figure 2:** Histogram start of treatment per day per group and cohort

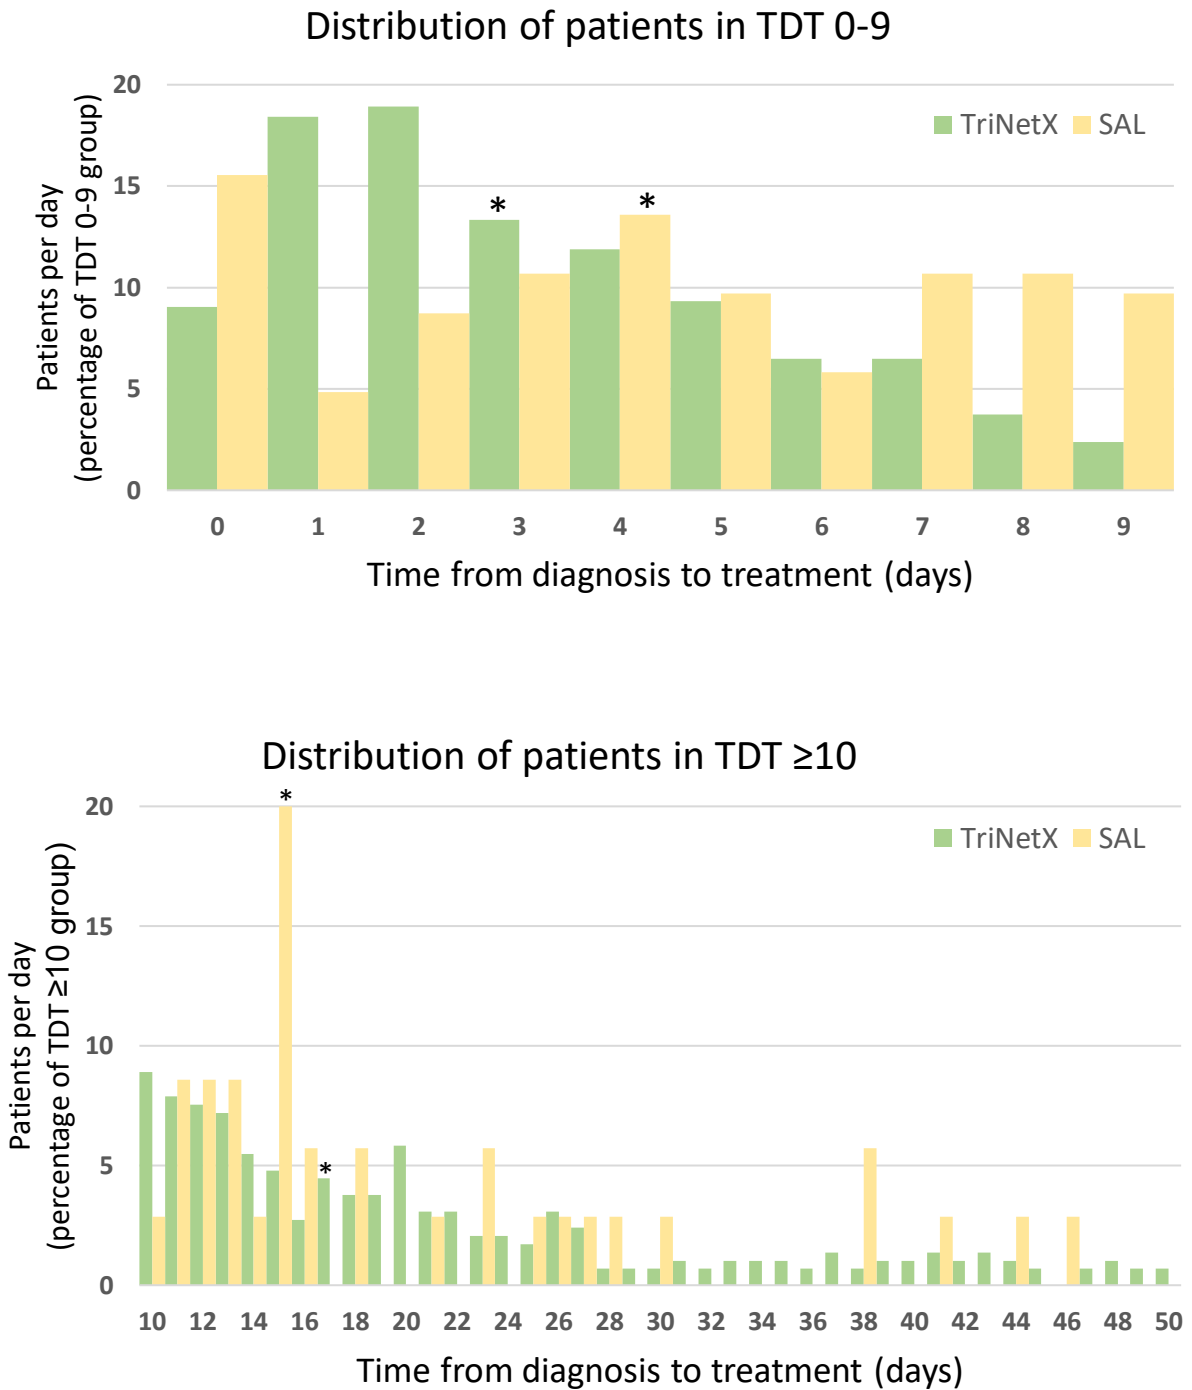

**Supplement Figure 2:** Relative frequency distribution of patients receiving treatment within the first 9 days and from day 10 to day 50 per cohort and TDT group. In the SAL-cohort, median TDT was 4 days (IQR 2-6 days) in the TDT 0-9 group and 15 days (IQR 12-21 days) in the TDT ≥10 group. In the TriNetX cohort, median TDT was 3 days (IQR 1-5 days) in the TDT 0-9 group and 17 days (IQR 13-25) in the TDT ≥10 group.

\* marks the median of each group. *Abbreviations:* TDT: time from diagnosis to treatment

**Supplement Figure 3a: Relapse-free Survival in SAL-cohort**

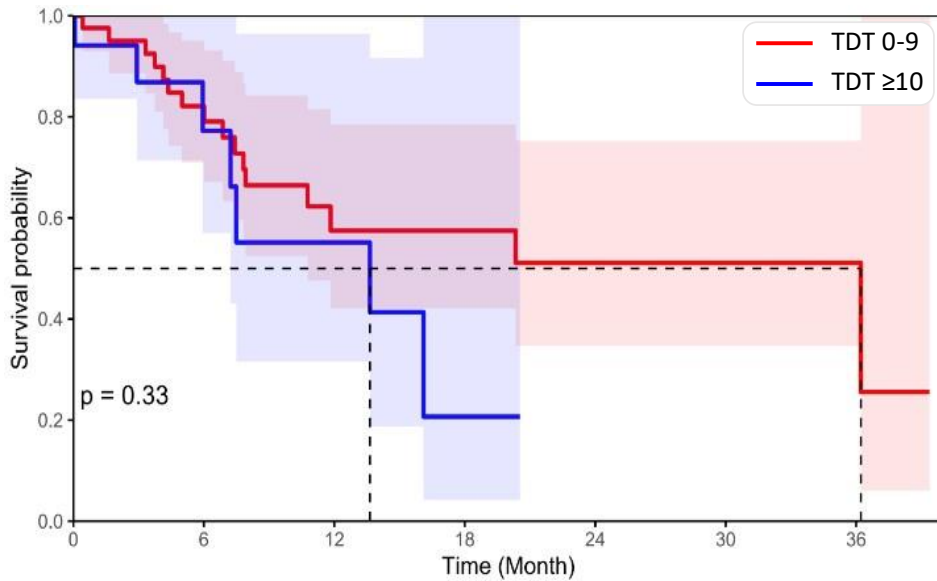

Patients at risk

| Time (Months) | 0  | 12 | 24 | 36 |
|---------------|----|----|----|----|
| TDT 0-9       | 44 | 12 | 6  | 3  |
| TDT ≥10       | 17 | 4  | 0  | 0  |

**Supplement Figure 3b: Event-free Survival in SAL-cohort**

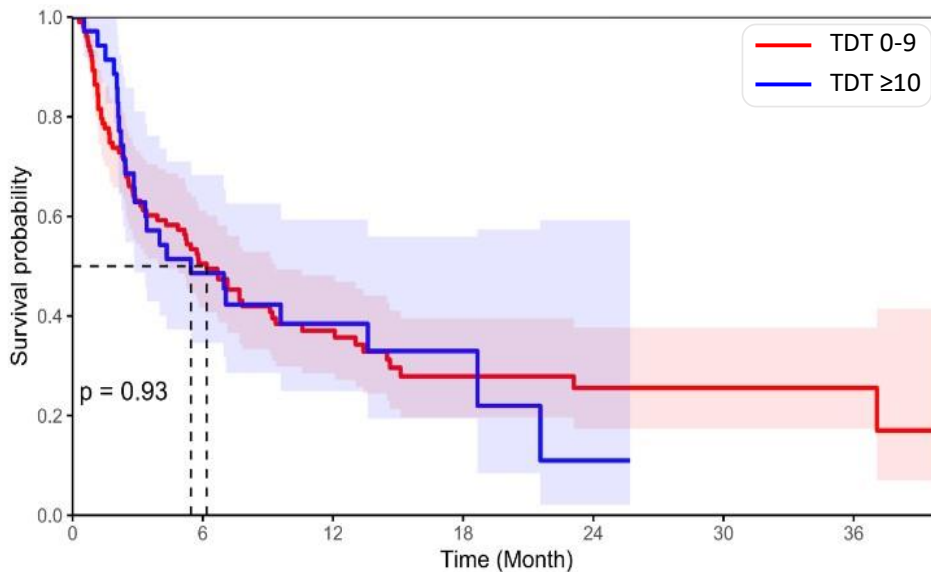

Patients at risk

| Time (Months) | 0   | 12 | 24 | 36 |
|---------------|-----|----|----|----|
| TDT 0-9       | 103 | 27 | 9  | 3  |
| TDT ≥10       | 35  | 7  | 1  | 0  |

**Supplement Figure 3:** a) Relapse free survival (RFS) and b) even-free survival (EFS) of patients in the SAL-cohort. An event was defined as death, failure of primary treatment or relapse, whichever occurred first. RFS was defined as relapse after complete remission. Median RFS was 36 (95% CI 11, -) and 14 (95% CI 7.2, -) months, respectively ( $p=0.33$ ). RFS at 12 months was 57% (95% CI 42%, 78%) and 55% (95% CI 32%, 96%). Median EFS was 6.2 (95% CI 4.3, 9.4) months in the TDT 0-9 group and 5.5 (95% CI 2.9, -) months in the TDT ≥10 group ( $p=0.93$ ). EFS at 12 months was 37% (95% CI 29%, 48%) and 38% (95% CI 25%, 59%). *Abbreviations:* TDT: time from diagnosis to treatment



**Supplement Figure 4a:** Overall Survival in SAL cohort – subgroup age  $\geq 75$  years

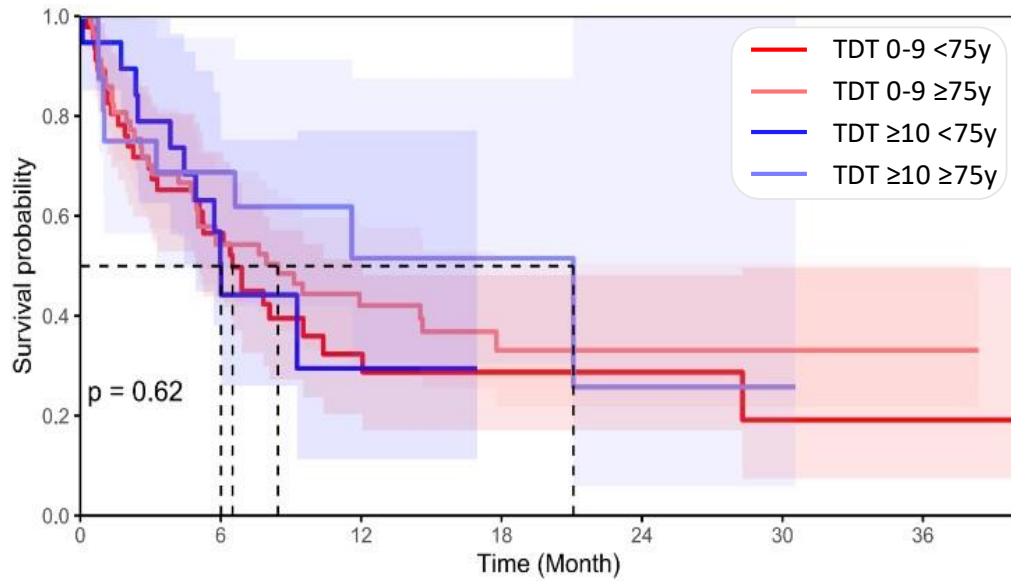

Patients at risk

| Time (Months)            | 0  | 12 | 24 | 36 |
|--------------------------|----|----|----|----|
| TDT 0-9 <75y             | 46 | 9  | 3  | 1  |
| TDT 0-9 $\geq 75y$       | 57 | 18 | 6  | 1  |
| TDT $\geq 10$ <75y       | 19 | 2  | 0  | 0  |
| TDT $\geq 10$ $\geq 75y$ | 16 | 5  | 1  | 0  |

**Supplement Figure 4b:** Overall Survival in SAL cohort – subgroup WBC  $\geq 20 \times 10^9/L$

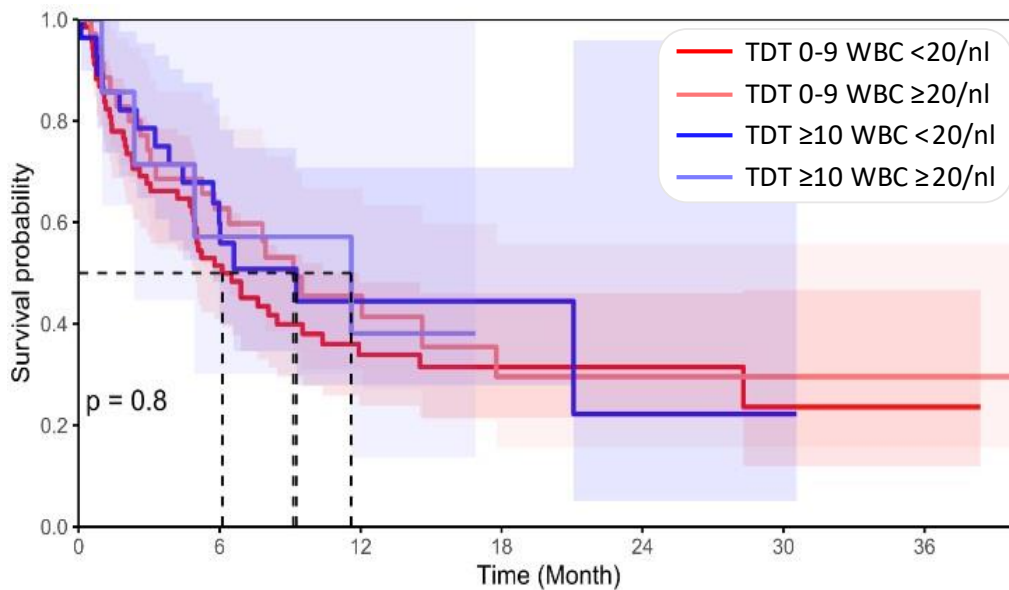

Patients at risk

| Time (Months)                  | 0  | 12 | 24 | 36 |
|--------------------------------|----|----|----|----|
| TDT 0-9 WBC <20/nl             | 68 | 16 | 6  | 1  |
| TDT 0-9 WBC $\geq 20/nl$       | 35 | 11 | 3  | 1  |
| TDT $\geq 10$ WBC <20/nl       | 28 | 5  | 1  | 0  |
| TDT $\geq 10$ WBC $\geq 20/nl$ | 7  | 2  | 0  | 0  |

**Supplement Figure 4:** OS of a) patients aged  $\geq 75$  years and with b) WBC  $\geq 20 \times 10^9/L$  in SAL cohort. Log-rank tests between TDT 0-9  $\leftrightarrow$   $\geq 75$  years and TDT 10-50  $\leftrightarrow$   $\geq 75$  were not significant. Log-rank tests between TDT 0-9  $\leftrightarrow$   $\geq 20 \times 10^9/L$  and TDT 10-50  $\leftrightarrow$   $\geq 20 \times 10^9/L$  were not significant. *Abbreviations:* TDT: time from diagnosis to treatment

**Supplement Table 2a:** Patient characteristics subgroup age  $\geq 75$  years TriNetX

|                                                  | <b>TDT 0-9 days</b> | <b>TDT 10-50 days</b> | <b>All</b>     | <b>p-value<sup>°</sup></b> |
|--------------------------------------------------|---------------------|-----------------------|----------------|----------------------------|
| <b>Total number, n (%)</b>                       | 198                 | 106                   | 304            |                            |
| <b>Patient characteristics</b>                   |                     |                       |                |                            |
| <b>Age (Mean <math>\pm</math> SD)</b>            | 79.1 $\pm$ 3.5      | 79.5 $\pm$ 3.5        | 79.2 $\pm$ 3.4 | .29                        |
| <b>Male, n (%)</b>                               | 105 (53)            | 57 (54)               | 161 (53)       | .90                        |
| <b>Female, n (%)</b>                             | 92 (46)             | 48 (45)               | 138 (47)       | .84                        |
| <b>BMI (Mean <math>\pm</math> SD)</b>            | 28.4 $\pm$ 5.7      | 28.1 $\pm$ 7.3        | 28.4 $\pm$ 6.1 | .78                        |
| <b>Lab. parameters (Median, IQR)</b>             |                     |                       |                |                            |
| <b>WBC (<math>\times 10^9/L</math>)</b>          | 5.2 (1.8-30.2)      | 3.5 (1.8-6.6)         | 4.1 (1.8-24.1) |                            |
| <b>Hemoglobin (g/dl)</b>                         | 8.3 (7.6-9.5)       | 8.5 (7.7-9.7)         | 8.4 (7.6-9.6)  |                            |
| <b>Platelets (<math>\times 10^{12}/L</math>)</b> | 53 (31-108)         | 57 (24-127)           | 54 (26-113)    |                            |
| <b>LDH (U/L)</b>                                 | 314 (222-548)       | 245 (195-428)         | 291 (203-496)  |                            |
| <b>Bilirubin (mg/dl)</b>                         | 0.6 (0.4-0.9)       | 0.6 (0.5-0.9)         | 0.6 (0.4-0.9)  |                            |
| <b>Kreatinin (mg/dl)</b>                         | 1.0 (0.8-1.4)       | 1.0 (0.8-1.2)         | 1.0 (0.8-1.4)  |                            |
| <b>Albumin (g/dl)</b>                            | 3.5 (3.1-3.9)       | 3.5 (3.1-3.9)         | 3.5 (3.1-3.9)  |                            |
| <b>CRP (mg/L) *</b>                              | 29 (8-100)          | 19 (5-129)            | 28 (6-100)     |                            |

<sup>°</sup> Bonferroni-correction was used to adjust for multiple testing;  $p < .00625$  for significance, \* value available for less than 30% of patients at first diagnosis. *Abbreviations:* TDT: time from diagnosis to treatment, WBC: white blood cell count, BMI: body mass index, LDH: Lactate dehydrogenase, CRP: C-reactive protein

**Supplement Table 2b:** Clinical outcomes subgroup age ≥75 years TriNetX

| Event (n, Risk %) | TDT 0-9 days | TDT 10-50 days | Odds ratio | 95% CI    |
|-------------------|--------------|----------------|------------|-----------|
| Severe Infection  | 63, 36.0     | 37, 39.8       | 0.85       | 0.51-1.43 |
| Renal failure     | 46, 36.2     | 35, 43.8       | 0.81       | 0.46-1.43 |
| Dialysis*         | *10, 5.1     | 0              | -          | -         |
| Liver Failure*    | *10, 5.1     | *10, 9.4       | -          | -         |
| Heart Failure     | 19, 10.6     | 14 14.3        | 0.71       | 0.34-1.49 |
| Bleeding          | 34, 22.5     | 20, 23.5       | 0.94       | 0.50-1.77 |
| Thrombosis        | 32, 19.0     | 13, 15.7       | 1.27       | 0.63-2.57 |
| HSCT*             | *10, 5.1     | 0              | -          | -         |

\* censored, number of patients 1-10. *Abbreviations:* TDT: time from diagnosis to treatment, HSCT: allogeneic hematopoietic stem cell transplant

**Supplement Figure 5:** Overall Survival in TriNetX cohort – subgroup age ≥75 years

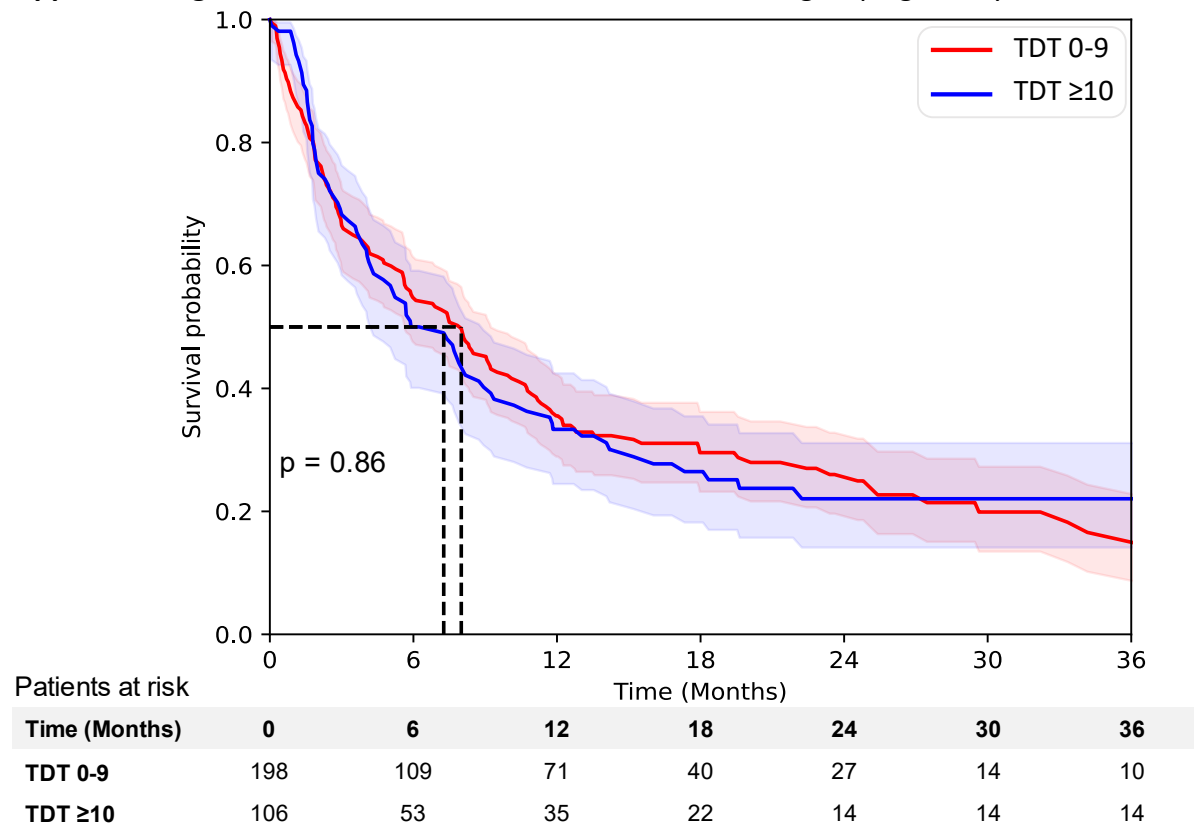

**Supplement Figure 5:** Overall survival of patients aged ≥75 years in the TriNetX-cohort. Overall survival was calculated from diagnosis of AML. Median OS was 7.9 (95% CI 5.5, 9.1) months in the TDT 0-9 group and 7.2 (95% CI 4.1, 8.6) months in the TDT ≥10 group (p=.86). *Abbreviations:* TDT: time from diagnosis to treatment

**Supplement Table 3a:** Patient characteristics subgroup WBC  $\geq 20 \times 10^9/L$  TriNetX

|                                                  | TDT 0-9 days    | TDT 10-50 days   | All              | p-value <sup>°</sup> |
|--------------------------------------------------|-----------------|------------------|------------------|----------------------|
| <b>Total number, n (%)</b>                       | 162             | 35               | 217              |                      |
| <b>Patient characteristics</b>                   |                 |                  |                  |                      |
| <b>Age (Mean <math>\pm</math>SD)</b>             | 72.8 $\pm$ 7.2  | 70.2 $\pm$ 11.8  | 72.4 $\pm$ 8.2   | .088                 |
| <b>Male, n (%)</b>                               | 89 (55)         | 21 (60)          | 110 (56)         | .58                  |
| <b>Female, n (%)</b>                             | 73 (45)         | 14 (40)          | 87 (46)          | .58                  |
| <b>BMI (Mean <math>\pm</math>SD)</b>             | 28.6 $\pm$ 6.6  | 27.7 $\pm$ 8.0   | 28.7 $\pm$ 6.6   | .68                  |
| <b>Lab. parameters (Median, IQR)</b>             |                 |                  |                  |                      |
| <b>WBC (<math>\times 10^9/L</math>)</b>          | 40 (24-63)      | 61 (26-103)      | 43 (24-63)       |                      |
| <b>Hemoglobin (g/dl)</b>                         | 8.0 (7.4-9.2)   | 8.4 (7.4-8.9)    | 8.0 (7.3-9.1)    |                      |
| <b>Platelets (<math>\times 10^{12}/L</math>)</b> | 42 (26-70)      | 37 (16-65)       | 40 (23-67)       |                      |
| <b>LDH (U/L)</b>                                 | 598 (376-1070)  | 986 (590-1706)   | 625 (394-1109)   |                      |
| <b>Bilirubin (mg/dl)</b>                         | 0.7 (0.4-0.9)   | 0.6 (0.4-0.9)    | 0.6 (0.4-0.9)    |                      |
| <b>Kreatinin (mg/dl)</b>                         | 1.1 (0.86-1.68) | 0.97 (0.78-1.26) | 1.02 (0.80-1.66) |                      |
| <b>Albumin (g/dl)</b>                            | 3.3 (2.8-3.6)   | 3.2 (2.9-3.5)    | 3.2 (2.9-3.6)    |                      |
| <b>CRP (mg/L) *</b>                              | 47 (20-100)     | 83 (0-118)       | 83 (20-118)      |                      |

<sup>°</sup> Bonferroni-correction was used to adjust for multiple testing;  $p < .00625$  for significance, \* value available for less than 30% of patients at first diagnosis. *Abbreviations:* TDT: time from diagnosis to treatment WBC: white blood cell count, BMI: body mass index, LDH: Lactate dehydrogenase, CRP: C-reactive protein

**Supplement Table 3b:** Clinical outcomes subgroup WBC  $\geq 20 \times 10^9/L$  TriNetX

| Event (n, Risk %) | TDT 0-9 days | TDT 10-50 days | Odds ratio | 95% CI    |
|-------------------|--------------|----------------|------------|-----------|
| Severe Infection  | 53, 38.4     | 16, 57.1       | 0.47       | 0.21-1.07 |
| Renal failure     | 26, 28.9     | *10, 41.7      | -          | -         |
| Dialysis*         | *10, 6.2     | *10, 28.6      | -          | -         |
| Liver Failure*    | *10, 6.3     | *10, 28.6      | -          | -         |
| Heart Failure*    | 12, 8.28     | *10, 29.4      | -          | -         |
| Bleeding*         | 33, 26.2     | *10, 43.5      | -          | -         |
| Thrombosis*       | 29, 21.8     | *10, 40.0      | -          | -         |
| HSCT*             | *10, 6.2     | *10, 28.6      | -          | -         |

\* censored, number of patients 1-10. *Abbreviations:* TDT: time from diagnosis to treatment, HSCT: allogeneic hematopoietic stem cell transplant

**Supplement Figure 6:** Overall Survival in SAL cohort – subgroup WBC  $\geq 20 \times 10^9/L$

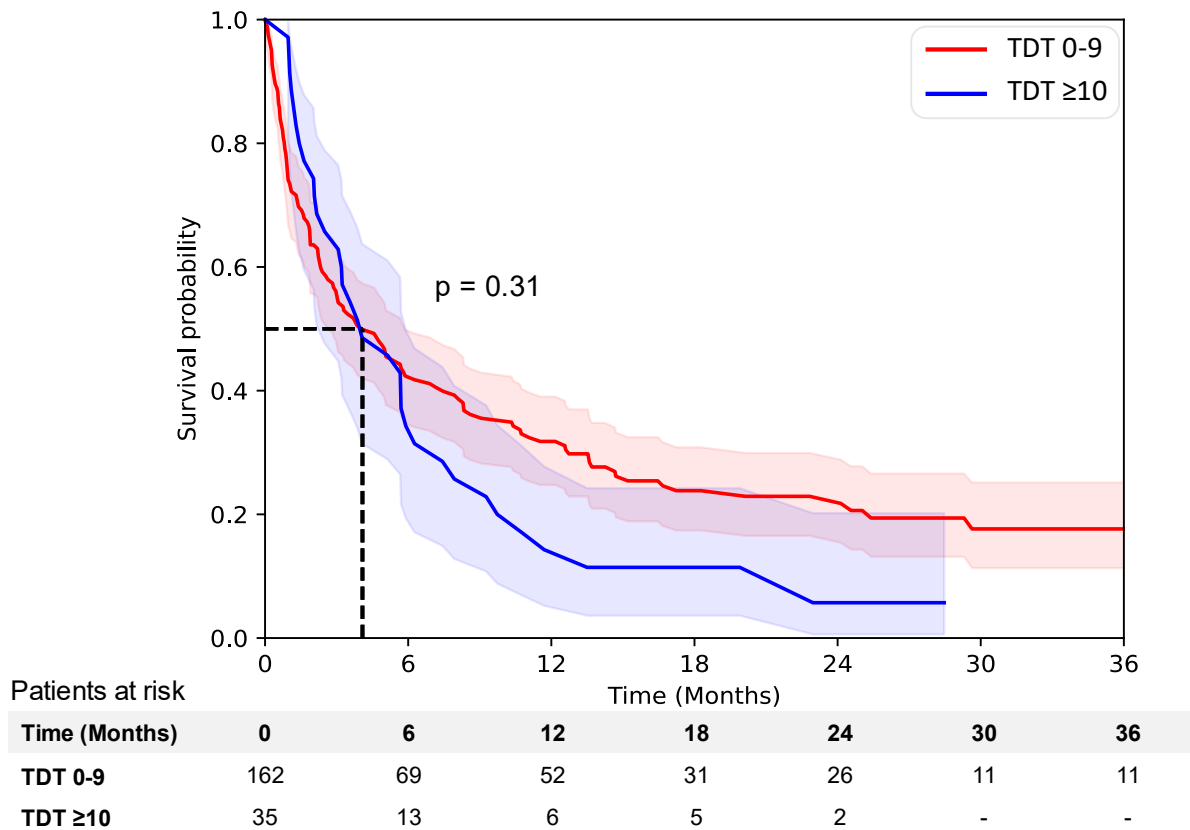

**Supplement Figure 6:** Overall survival of patients with WBC  $\geq 20 \times 10^9/L$  in the TriNetX-cohort. Overall survival was calculated from diagnosis of AML. Median OS was 4.0 (95% CI 2.5, 5.7) months in the TDT 0-9 group and 4.0 (95% CI 2.1, 5.6) months in the TDT  $\geq 10$  group ( $p=.31$ ). *Abbreviations:* TDT: time from diagnosis to treatment

**Supplement Table 4a:** Patient characteristics subgroup comorbidities TriNetX

|                                       | <b>TDT 0-9 days</b> | <b>TDT 10-50 days</b> | <b>All</b>     | <b>p-value<sup>°</sup></b> |
|---------------------------------------|---------------------|-----------------------|----------------|----------------------------|
| <b>Total number, n (%)</b>            | 323                 | 152                   | 475            |                            |
| <b>Patient characteristics</b>        |                     |                       |                |                            |
| <b>Age (Mean ±SD)</b>                 | 71.5 ± 8.33         | 72.7 ± 9.61           | 71.9 ± 8.77    | .14                        |
| <b>Male, n (%)</b>                    | 187 (57)            | 98 (64)               | 285 (60)       | .24                        |
| <b>Female, n (%)</b>                  | 136 (43)            | 54 (36)               | 190 (40)       | .24                        |
| <b>BMI (Mean ±SD)</b>                 | 30.2 ± 7.0          | 27.1 ± 6.5            | 30.0 ± 7.1     | .01                        |
| <b>Lab. parameters (Median, IQR)</b>  |                     |                       |                |                            |
| <b>WBC (x10<sup>9</sup>/L)</b>        | 5.4 (2.1-28.4)      | 3.4 (1.4-7.4)         | 4.1 (1.6-24.0) |                            |
| <b>Hemoglobin (g/dl)</b>              | 8.1 (7.6-9.4)       | 8.5 (7.8-9.3)         | 8.3 (7.6-9.4)  |                            |
| <b>Platelets (x10<sup>12</sup>/L)</b> | 43 (24-92)          | 51 (21-98)            | 46 (24-96)     |                            |
| <b>LDH (U/L)</b>                      | 352 (226-474)       | 251 (178-463)         | 320 (209-602)  |                            |
| <b>Bilirubin (mg/dl)</b>              | 0.6 (0.5-0.9)       | 0.6 (0.4-0.9)         | 0.6 (0.4-0.9)  |                            |
| <b>Kreatinin (mg/dl)</b>              | 1.0 (0.76-1.4)      | 0.93 (0.74-1.3)       | 1.0 (0.76-1.4) |                            |
| <b>Albumin (g/dl)</b>                 | 3.4 (3.0-3.9)       | 3.6 (3.2-4.0)         | 3.5 (3.1-3.9)  |                            |
| <b>CRP (mg/L) *</b>                   | 47 (20-125)         | 38 (5-83)             | 28 (9-118)     |                            |

<sup>°</sup> Bonferroni-correction was used to adjust for multiple testing; p < .00625 for significance, \* value available for less than 30% of patients at first diagnosis. *Abbreviations:* TDT: time from diagnosis to treatment, WBC: white blood cell count, BMI: body mass index, LDH: Lactate dehydrogenase, CRP: C-reactive protein

**Supplement Table 4b:** Clinical outcomes subgroup comorbidities TriNetX

| Event (n, Risk %) | TDT 0-9 days | TDT 10-50 days | Odds ratio | 95% CI    |
|-------------------|--------------|----------------|------------|-----------|
| Severe Infection  | 131, 45.6    | 66, 49.6       | 0.85       | 0.57-1.29 |
| Renal failure     | 122, 56.2    | 57, 49.6       | 1.31       | 0.83-2.06 |
| Dialysis*         | *10, 3.10    | *10, 6.60      | -          | -         |
| Liver Failure*    | 19, 5.92     | *10, 6.60      | -          | -         |
| Heart Failure     | 41, 14.2     | 28, 19.9       | 0.67       | 0.39-1.14 |
| Bleeding          | 85, 34.4     | 28, 24.3       | 1.63       | 0.99-2.69 |
| Thrombosis        | 61, 22.7     | 24, 20.2       | 1.16       | 0.68-1.97 |
| HSCT*             | 18, 5.59     | *10, 6.58      | -          | -         |

\* censored, number of patients 1-10. *Abbreviations:* TDT: time from diagnosis to treatment, HSCT: allogeneic hematopoietic stem cell transplant

**Supplement Figure 7:** Overall Survival in TriNetX cohort – subgroup comorbidities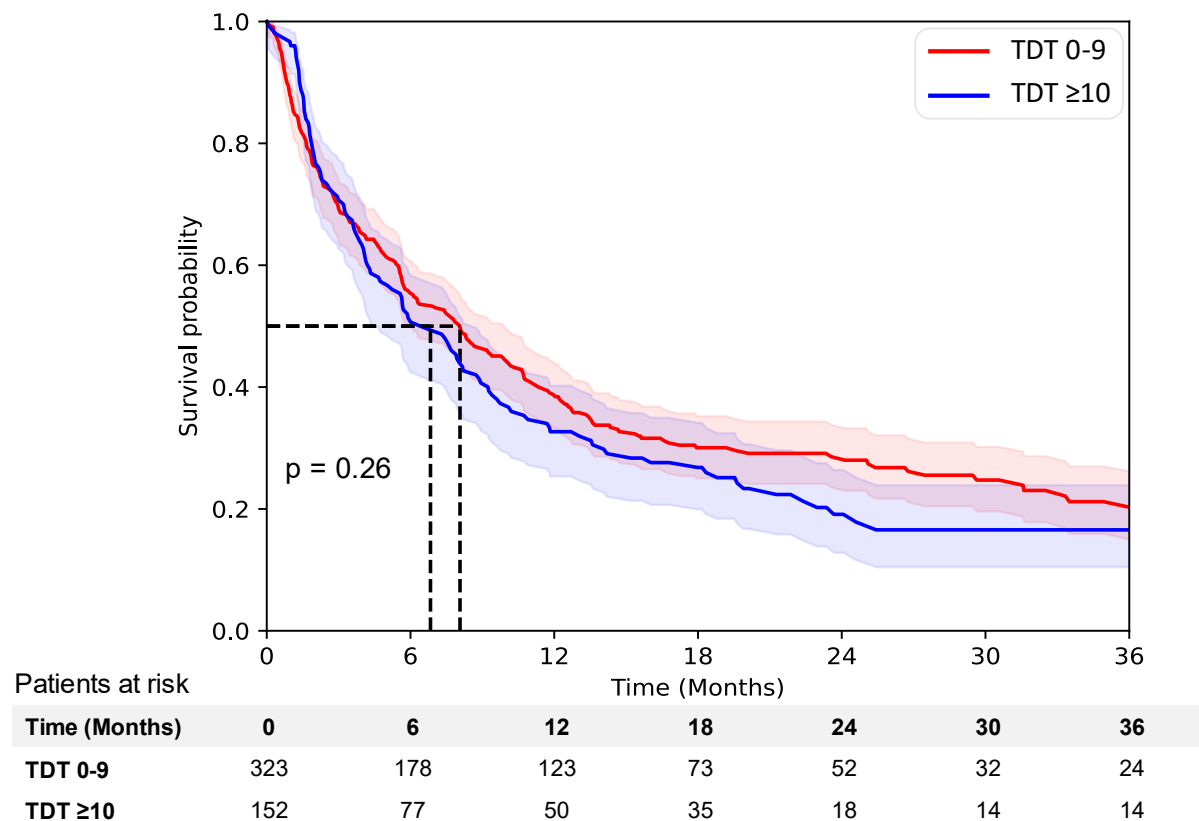

**Supplement Figure 7:** Overall survival of patients with comorbidities in the TriNetX-cohort. Overall survival was calculated from diagnosis of AML. Median OS was 7.9 (95% CI 5.8, 9.7) months in the TDT 0-9 group and 6.7 (95% CI 4.3, 8.1) months in the TDT ≥10 group ( $p=0.26$ ). *Abbreviations:* TDT: time from diagnosis to treatment
